# Supplementary material
Source: PubMed Central journal article supplement (PMC2890240)
Supplement: NIHMS203711-supplement-supplement_1.pdf [file NIHMS203711-supplement-supplement_1.pdf]

## List of Supplemental Digital Content

SDC1\_listeners-guide.doc

SDC2\_1-CF-match.mp3

SDC2\_2-CR-mismatch.mp3

SDC2\_3-RF-match.mp3

SDC2\_4-RR-mismatch.mp3

SDC2\_5-TF-match.mp3

SDC2\_6-TF-mismatch.mp3

SDC2\_7-TR-match.mp3

SDC2\_8-TR-mismatch.mp3

SDC3\_all-sequences.doc

SDC4\_random-vs-fixed-comparisons.doc

SDC5\_phonological-unit-comparisons.doc

SDC6\_reactiontime-accuracy-by-unit-and-task.doc
